# Supplementary material for: Clinical significance of NGAL and KIM-1 for acute kidney injury in patients with scrub typhus
Source: PLoS One. 2017 Apr 18;12(4):e0175890. doi: 10.1371/journal.pone.0175890 (PMC5395225; doi:10.1371/journal.pone.0175890)
Supplement: S1 File — (XLSX) [file pone.0175890.s001.xlsx]

## Sheet: Sheet1
Number	sex	age	DM	HBP	CKD	AKI	Hg	WBC	Platelet	CRP	BUN	Cr	GFR	Baseline reanl function	TB	AST	ALT	Albumin	Na	K	urine NGAL/Cr	serum NGAL	urine KIM1/Cr	serum KIM1	IL-10	TNF	IFN
1	1	59	2	2	2	0	16.2	35	121	3.93	10	1	74	1	0.3	38	57	4.8	136	4.8	9.3	86.7	1	0.2	3.9	3.7	47.34
2	1	54	2	2	2	0	15.7	2	97	0.87	13	1	79	1	0.6	66	28	4.2	131	3.9	13.4	46.1	0.6	0	10	2.4	19.62
3	1	67	2	2	2	0	13.3	6	171	0.33	25	1	60	1	0.3	29	17	0.33	138	4.2	5.8	101.1	2	0.2	11.2	3.5	522.97
4	2	76	2	1	2	1	9.4	12	135	4.66	30	1.5	23	2	0.6	62	18	3.2	141	3.5	17.8	842.1	6	0.7	246.5	66.2	8.42
5	2	53	1	1	2	0	10.1	4	107	3.07	20	0.9	59	1	0.7	33	25	3.7	133	3.8	92	91.3	2	0.3	31.8	10.2	15.47
6	2	39	2	2	2	0	13.4	52	99	2.19	5	0.7	74	1	0.5	38	31	4.2	133	3.7	3.7	49.8	0.8	0	21.5	2.7	10.7
7	1	76	2	2	2	0	14.3	6	258	0.1	15	1.1	73	1	0.9	26	19	4.6	140	4.4	6.1	49.1	2.1	0.1	0.7	2	1.82
8	2	77	2	2	2	0	13.2	4	160	2.26	14	1	37	1	0.9	28	17	4.5	132	4.5	5.6	80.3	0.8	0.1	8.3	4.2	139.98
9	2	74	2	1	2	0	13.2	13	259	6.17	14	0.7	65	2	0.7	42	48	3.5	135	3	24.6	246.7	4.5	0.3	108.7	14.1	28.07
10	2	76	1	1	2	1	10.7	25	105	2.89	35	1.8	24	1	0.4	66	111	3.1	140	3.7	1610.8	915.6	4	0.4	280.5	50	3.52
11	2	69	2	2	2	0	13.1	4	88	6.29	17	0.9	49	2	0.6	86	22	4.2	136	4.4	18.9	47.9	2	0.2	13.1	3	13.94
12	1	66	2	1	2	0	14.7	7	130	6.74	13	0.9	81	1	0.6	43	35	3.9	133	3.7	6.1	81.3	1.3	0.1	19.6	6.7	42.56
13	1	84	2	2	2	1	14.4	9	160	5.2	37	1.5	25	2	0.6	114	29	3.2	131	4	168.3	181.3	6.6	0.5	505.1	8.5	73.66
14	1	84	2	1	2	0	10.4	8	120	11.67	26	1.1	60	2	0.9	68	52	3.1	132	4.5	14.8	372.9	2.9	0.2	61.1	11	13.62
15	2	59	2	2	2	0	9.9	5	92	9.77	8	0.7	78	1	0.4	55	32	3.2	135	3.8	10	134.8	2.3	0.1	64.1	11.8	19.16
16	2	58	2	1	2	0	13.1	10	280	4.93	6	0.8	75	2	0.8	43	45	4	133	4	10	100.6	1.2	0.2	5.4	4.8	7.21
17	2	52	2	2	2	0	11.9	4	201	3.2	16	0.7	91	1	0.8	20	16	4	133	4	22.8	73	1.6	0.2	1.4	1.3	2.79
18	2	72	2	2	2	0	13.2	3	116	4.96	9	0.8	63	1	0.8	142	189	3.9	135	3.3	23.8	72	2.5	0.3	19.7	5.6	45.32
19	1	68	2	2	2	0	12.9	5	81	5.3	26	1.2	55	2	1.2	37	24	4.1	136	3.5	3.4	74.4	0.8	0.2	20.1	6.5	21.55
20	1	58	2	1	2	0	14.9	12	193	5.79	14	0.9	99	1	1.9	55	51	4.9	142	3.5	2.2	73.6	1.1	0.2	3.2	3	15.38
21	2	65	2	2	2	0	13	4	161	5.38	15	0.7	76	2	0.5	130	63	3.9	132	3.5	12.9	122.2	1.7	0.2	34.9	10.7	188.43
22	2	78	2	2	2	0	12.6	6	203	2.64	13	0.7	54	2	0.7	70	34	4.2	132	4	8.3	49.7	2.2	0.2	19.4	6.2	394.58
23	2	62	2	1	2	0	13.5	15	156	1.01	17	0.7	68	1	0.5	60	82	3.2	130	3.8	11	117.5	0.8	0.1	17.4	5.7	12.69
24	2	65	2	2	2	0	13.1	6	217	2.36	13	1	50	1	0.6	350	192	3.7	136	3.9	51.2	70.8	13.5	0.7	11.4	3	6.56
25	2	66	2	2	2	0	12.9	4	120	6.67	13	0.7	76	1	0.6	70	47	3.2	125	3.9	7.2	96	1.7	0.2	73.2	12.3	21.55
26	1	41	2	2	2	0	14.2	5	90	4.29	13	1.1	100	2	1.3	73	77	4.1	135	3.7	4.1	102.1	1.1	0.2	36	4.3	66.6
27	2	61	2	2	2	0	13.4	5	164	0.99	14	0.6	76	1	0.4	42	28	3.9	138	3.6	5.8	61.5	1	0.2	1	2.4	4.89
28	1	42	2	2	2	0	15.4	3	120	5.72	13	0.8	150	1	0.6	98	114	4.1	138	3.6	3.8	54.7	0.8	0.1	21.7	6.1	48.45
29	2	72	2	1	2	0	13.2	5	163	7	9	0.6	73	1	0.8	44	41	3.9	132	3.8	8.4	128.8	1.8	0.1	37.4	6.7	20.08
30	2	56	2	2	2	0	15.3	2	145	4	10	0.8	82	1	0.8	57	40	4	136	4.2	17.7	35.4	0.7	0.1	43.4	4.1	809.95
31	1	50	2	2	2	0	13.9	14	269	3.89	13	0.9	96	1	0.8	406	659	3.7	127	4.5	10.4	127.5	0.9	0.4	12.3	5.3	11.67
32	2	85	2	1	2	1	9.6	13	111	11.39	35	1.1	28	2	0.6	100	49	3	136	4.4	1376.9	415.3	5.4	1.1	66.9	27.3	24.12
33	2	53	1	1	2	0	13.5	5	121	9.64	14	0.6	101	2	0.4	179	224	3.2	133	3.5	61.8	40.8	0.3	0.2	27.3	4	78.74
34	2	74	1	1	1	0	10.6	10	123	9.61	28	1.3	36	2	0.7	60	15	3.4	136	4.3	110.6	167.3	2.5	1.2	29.4	5.2	11.76
35	2	63	1	2	2	0	11.6	4	86	10.79	15	0.9	59	1	0.9	341	121	3.7	135	4.2	70.3	256	2.4	0.6	85.4	12.1	63.44
36	1	42	2	2	2	0	15.4	3	91	6.62	10	0.9	129	2	1.6	99	111	3.8	138	4	4.7	88.8	0.9	0.2	425.4	5.9	165.9
37	2	73	1	2	2	0	11.1	10	119	11.2	24	0.7	57	1	0.7	252	97	2.8	131	3.6	20.9	163.2	3.7	0.2	45.4	6.8	9.12
38	2	75	2	1	2	0	12.7	4	197	0.94	20	1.1	65	1	0.2	27	29	4	141	3.7	27.7	54.3	1.8	0.6	2.1	2.2	3.97
39	1	36	2	2	2	0	13.6	4	86	4.57	10	1	89	1	1	248	322	3.9	136	3.5	7.7	73.5	1.1	0.6	17	5.4	48.68
40	1	43	2	2	2	0	15.7	3	82	1.57	7	0.8	108	2	2.2	236	227	4.5	136	3.6	5.5	42.2	0.5	0.5	25.4	7.6	7.77
41	1	75	2	2	2	1	13.7	12	111	5.42	39	1.7	23	2	0.5	93	62	3.2	128	4.4	33.7	199.5	2.5	0.3	55.4	9.4	7.95
42	2	63	2	2	2	0	14.5	9	164	2.38	15	0.7	85	2	0.5	53	35	3.7	134	3.9	9	63.8	1.2	0.1	4.1	2.5	3.88
43	2	68	1	1	2	1	10.4	6	80	2.65	28	1.2	48	1	1	43	27	3.6	132	4.4	20.5	93.8	2.1	0.2	51.2	3.8	31.92
44	1	75	2	2	2	0	12.2	8	144	14.83	16	0.8	62	2	0.8	143	163	3.7	141	4	64.7	288	5.2	0.4	68.8	10.4	14.91
45	2	69	1	1	1	1	10.1	9	179	10.11	42	3.8	13	1	0.4	67	36	3	133	4.7	504.8	423.2	1.8	1	54.5	13.2	10.09
46	2	72	2	2	2	0	11.4	8	81	8.11	18	0.9	54	2	0.4	70	44	3.4	126	4.4	15.7	141.1	2.6	0.1	74.9	22	16.39
47	2	74	2	1	2	0	10.6	4	55	6.14	19	0.9	43	1	0.8	42	25	2.9	129	3.9	13	161.6	2.3	0.1	67.7	7.2	10.46
48	1	55	2	2	2	0	17.2	6	78	2.11	7	1	77	2	1.3	48	28	4.5	137	4.2	4.4	92.3	1.4	0.1	8.4	2.1	195.35
49	2	81	2	1	2	0	15	10	72	14.66	23	1.1	35	1	1.6	102	51	3.5	137	4.5	28.6	250.2	2.8	0.7	83.2	15.2	25.46
50	2	80	2	1	2	0	13.7	7	97	4.81	18	0.9	43	1	0.8	79	37	3.4	136	4.9	14.4	99.5	2.2	0.2	85.7	14	19.16
51	2	77	2	2	2	0	14.4	5	106	9.6	22	1.1	34	2	0.5	85	58	3.8	138	3.5	10.5	120.4	6.3	0.2	63.3	14.4	50.66
52	1	76	2	2	2	0	12.8	7	148	8.26	12	0.8	66	2	0.7	89	78	3.5	131	4.5	15.1	105.2	1.2	0.3	53.7	13.1	21
53	2	75	1	1	2	0	10.9	4	179	0.5	16	1.2	31	1	1.2	33	15	3.9	131	4	5.7	45.7	2	0.5	9.7	3.2	161.36
54	1	73	1	1	2	0	15.9	9	153	7.36	19	1.1	46	2	1.1	86	95	4.3	132	4.5	15.8	112.1	2.8	0.4	34.6	5.3	14.17
55	2	80	2	1	2	0	10.1	13	159	7.46	29	1.2	33	1	0.2	23	18	2.2	138	3.4	212.5	438.5	5.4	0.3	67.7	12.5	30.18
56	2	27	2	2	2	0	12.6	9	191	8.39	5	0.6	173	2	0.7	38	38	3.4	133	3.5	9.3	137.3	1	0.1	22.3	5.5	28.12
57	2	33	2	2	2	0	11.9	6	116	2.59	8	0.6	117	2	0.4	98	54	3.9	134	3.6	7.5	51.2	1.2	0.1	17	4.4	25.91
58	2	71	2	2	2	0	14.3	3	86	3.17	12	0.8	79	1	0.8	40	26	3.6	132	4	9.4	65.7	1.3	0.2	9.3	2.7	135.37
59	2	56	2	2	2	0	12.6	5	58	9.79	8	0.4	140	1	0.7	166	102	3.3	137	3.3	33.9	67.9	2.5	0.4	56	5	21.83
60	2	56	1	1	2	1	9.8	8	58	12.36	39	1.8	43	1	0.7	65	54	3.1	136	4	196.4	403.5	3.7	0.5	364.9	23.9	16.76
61	2	65	2	2	2	0	10.1	5	52	17.68	13	0.9	51	1	0.5	56	57	3.1	129	3.4	212.5	438.5	5.4	0.3	67.7	12.5	30.18
62	1	73	2	1	2	0	13.5	4	134	12.65	21	1	56	1	1.4	65	49	3.9	131	3.9	24.4	199.1	1.6	0.2	231	13.3	75.87
63	2	51	2	2	2	0	13.9	4	78	2.5	8	0.8	86	2	1.2	38	27	4.3	129	3.9	1.1	41.1	0.7	0.1	6	2.4	354.38
64	2	77	2	1	2	1	10.6	18	55	18.84	65	2.5	17	2	1.1	135	99	3.3	137	3.5	543.6	723.4	6	1.3	155.9	71.6	31.65
65	2	63	2	2	2	1	11.1	12	78	12.9	21	1.2	51	2	0.9	134	102	3.2	139	4.3	21.8	524	2.2	0.6	63.4	17.9	35.82
66	2	52	2	1	2	0	13.8	7	184	5.51	13	0.8	86	1	0.4	67	74	3.7	136	4	12.3	113.8	1.2	0.3	112.3	15.5	71.04
67	1	47	2	2	2	0	13	3	110	0.88	26	1	64	2	0.4	66	40	3.9	127	3.5	32.5	25	1	0.1	173.1	4.1	59.91
68	2	65	2	1	2	0	12.7	10	128	6.75	24	0.7	77	2	0.5	292	289	3.7	140	3.5	82.2	78.3	4	0.7	68.5	11.8	20.17
69	1	58	2	1	2	0	16.3	6	94	5.36	12	0.9	63	1	1	57	51	3.9	138	3.3	6.7	98.5	0.5	0.1	25.9	8.1	92.27
70	2	71	2	1	2	0	10.3	7	66	1.04	12	0.7	57	1	0.8	134	94	2.9	136	2.4	32.3	93.1	3.3	0.4	20.6	5	7.72
71	2	79	2	2	2	0	9.5	7	208	4.68	22	0.8	42	2	0.6	124	97	3.3	141	3.7	17	114.7	1.5	0.2	30.3	10.4	293.55
72	2	68	2	2	2	0	13.7	7	108	5.82	18	0.6	75	2	0.6	112	124	3.4	133	3.8	28.5	76.8	2.5	0.5	66.6	27.6	55.87
73	1	20	2	2	2	0	13.6	3	102	1.61	11	1.3	96	2	0.9	47	32	4.1	139	3.5	1.3	43.9	1	7	22.2	10	296.45
74	2	81	1	2	2	0	13.6	4	145	1.51	15	1.1	43	1	0.3	26	18	3.3	140	4.3	32.6	89.3	2	0.2	29.2	13.5	44.82
75	2	56	2	2	2	0	12.2	5	116	2.49	13	0.8	74	2	0.7	65	48	4.3	135	3.8	38.2	56.9	1.7	0.1	62	24.9	62.44
76	2	62	2	2	2	0	14.8	5	130	7.16	14	0.7	70	2	0.8	136	142	3.9	140	3.9	52.4	104.6	2	0.3	12.8	14.6	156.18
77	2	79	2	1	1	1	9.8	14	112	9.22	54	2.4	11	1	0.8	42	27	3.5	128	4	77.7	75.4	1.8	0.1	15.3	9.6	188.5
78	1	68	2	1	2	0	12.6	3	241	0.48	12	0.8	57	1	0.5	56	51	4.2	141	4.3	5.9	299.4	1.6	0.2	180.1	72.1	108.25
79	2	48	2	2	2	0	13.5	7	128	0.53	6	0.7	81	2	0.7	105	54	3.9	137	4.4	7.3	74.4	1.2	0.1	44.2	26.5	93.75
80	2	71	2	2	2	0	10.8	7	154	11.12	9	0.7	67	2	0.6	205	187	3.5	131	4.3	32.7	148.3	9.7	0.3	70.5	29.4	86.54
81	1	64	1	1	2	0	13	7	85	2.24	14	0.9	68	2	1.1	52	40	4	134	4	39.7	61.5	2.4	0.2	56.2	13.3	26.97
82	1	76	2	1	1	1	11.3	4	150	0.59	31	1.6	34	1	0.6	12	10	3.9	136	4.8	14.1	107.4	3.3	0.3	42.5	15.1	942.53
83	1	86	2	2	2	0	14.6	4	92	4.58		1	34	1	0.6	59	29	3.8	135	4	11.3	132.5	2.6	0.2	18.2	19.1	135.06
84	1	58	2	2	2	0	13	12	238	6.94	16	1	86	2	0.4	40	28	3.5	132	3.6	16.1	78.5	1.8	0.1	28.2	15.5	34.02
85	1	67	1	1	1	1	9.6	12	107	14.7	62	3.3	15	1	0.9	63	75	3.1	127	4.9	123.7	509.4	1.6	1.2	209.1	52.1	55.52
86	1	71	2	1	2	0	13.9	12	82	16.25	28	1.2	46	1	0.6	75	41	3.5	130	4.4	32.4	199.6	3.3	0.2	90	29.9	90.91
87	2	66	2	1	2	0	12.3	8	147	2.23	15	1	51	2	0.5	43	22	4.1	135	3.6	7.7	112.5	1.7	0.1	93.4	31.5	817.47
88	2	53	2	1	2	0	13.2	6	135	5.91	8	1	72	1	0.6	118	75	3.7	143	4.3	13.1	70	2.1	0.2	52.9	17.5	318.68
89	2	65	1	2	2	0	13.3	7	170	6.27	15	0.8	96	2	0.7	26	32	4.6	145	4.5	10.4	77.4	1.9	0.4	168.2	14.5	229.08
90	2	62	1	1	2	0	12.9	8	98	7.37	8	0.8	89	1	0.6	170	265	3.3	136	3.8	26.7	96.9	4.3	0.7	18.7	30.8	327.88
91	2	65	1	2	2	0	13.8	6	180	1.45	7	0.6	83	1	1.1	23	19	4.3	143	3.1	80.6	58.3	3.8	0.1	22.4	42.4	1247.45
92	2	59	1	1	2	0	15	4	164	1.56	21	0.8	100	1	0.4	36	40	4.3	143	4.5	3.9	57.4	2.8	0.2	9.2	9.5	140.35
93	1	51	1	1	2	1	13.3	7	377	0.94	18	1.5	46	1	0.5	22	26	4.4	139	4.5	38.6	131.4	1.4	1.8	26.2	30.3	1124.28
94	1	55	2	2	2	0	13	4	117	3.81	15	0.8	80	1	1	81	60	3.9	135	3.6	34.7	94.2	2.3	0.3	148.2	10.6	310.18
95	1	53	1	2	2	0	10.5	10	192	11.44	15	0.8	84	1	0.6	48	42	3.9	132	3.9	7.5	187.9	3.1	0.2	126.9	19.9	26.22
96	2	66	2	1	2	0	12.1	5	251	3.71	18	0.8	82	1	1	30	41	4.4	138	4.2	78.4	74	9.7	0.9	32.4	10.3	71.16
97	2	54	2	2	2	0	12.3	3	73	1.56	12	0.8	82	2	0.7	92	62	4.2	140	3.7	6.9	39.7	1.2	0.2	19.9	10.1	53.78
98	2	86	2	2	2	1	10.7	9	92	14.49	38	1	40	2	0.8	48	76	2.6	140	4.8	27.1	127.7	2.4	0.4	38.2	47.7	39.28
99	2	76	2	2	2	0	11.9	7	136	5.9	19	0.9	43	2	1.2	92	74	3.7	131	4	52.7	114.8	2.3	0.3	65.9	20.9	106.75
100	1	59	2	2	2	0	13.8	9	114	2.8	9	1.1	61	2	1.1	92	86	3.6	132	4.8	30.2	140.7	2.6	0.4	40.7	18.7	207.35
101	1	78	2	1	2	1	11.2	13	114	14.76	27	0.9	36	1	0.8	168	74	2.8	139	4.5	132	281.8	7.4	0.8	11.2	251.5	92.58
102	2	78	2	1	2	1	11.1	16	67	15.9	51	1.9	21	1	1	56	39	2.7	135	4	144.6	941.8	4.7	0.8	579.8	114.7	217.13
103	2	57	2	2	2	0	13.2	4	151	5.22	11	0.7	94	2	0.5	46	49	4.5	141	4	9.1	36.1	2.4	0.1	3.2	6.9	76.09
104	1	78	1	1	2	1	14.3	7	88	7.97	109	4.7	9	2	2.6	87	72	2.7	140	4.3	2942.6	621.4	11.4	1.7	409.1	191.3	382.14
105	1	72	2	2	2	1	9.3	16	178	10.36	46	1.6	27	2	0.5	82	68	3.1	138	4.7	255.9	334.6	6.4	1.5	34.7	46.7	17.31
106	1	86	1	1	1	1	14.3	4	127	4.03	29	1.7	25	1	0.7	43	24	3.9	134	3.5	12.9	149.6	2.5	0.5	32.7	27.4	649.49
107	2	55	1	2	2	0	12.4	6	108	5.42	13	1	81	2	0.5	59	49	3.8	135	4	52.6	131	1.7	0.2	32.2	12.5	569.87
108	2	68	2	2	2	0	12.9	7	109	5.62	16	0.7	77	2	0.7	107	90	3.4	137	3.8	11.3	174.5	1.3	0.1	55.7	30.2	122.18
109	2	76	2	1	2	0	12.3	3	174	2.45	13	0.8	56	1	0.6	40	25	4.1	140	3.7	6.7	57.6	1.3	0.1	24.2	12.2	1537.52
110	1	82	2	1	2	0	12.4	5	147	1.38	25	1	54	2	1.4	34	16	4.6	138	4.5	7	263.5	2.5	0.4	19.5	11.9	655.24
111	1	73	1	1	1	1	11.2	5	59	7.72	40	2.4	24	1	1.5	98	100	4.6	134	5	17.1	215	1	0.7	47.8	31.9	84.69
112	2	82	2	2	2	0	9.9	5	46	7.33	16	1	35	1	0.3	47	28	3.4	134	4.2	262.3	148.7	4.8	0.3	101.2	24.6	370.52
113	2	65	2	2	2	0	15.3	10	84	7.29	21	0.9	64	1	0.7	226	152	3.9	134	3.8	34.3	121.2	3.3	0.4	115.7	58	119.2
114	2	64	2	1	2	0	12.9	4	72	8.4	12	0.8	91	1	0.7	78	48	3.6	132	3.7	21.9	125.2	4.1	0.4	72.5	11.5	113.89
115	1	39	2	2	2	0	15.7	5	163	4	11	1	110	2	0.5	63	80	4.1	137	4.2	4.6	55.4	0.3	0.1	54.2	22.6	108.53
116	2	73	2	1	2	0	10.8	7	79	9.69	13	0.7	64	1	2	41	24	3.1	135	3.4	65.1	139.5	4.1	2.1	177.4	29.3	39.27
117	1	73	2	2	2	0	17.2	7	114		14	1	58	2	1.3	71	60	3.9	133	4	13.8	61.7	3.2	0.2	952.8	15	39.63
118	1	82	2	1	1	1	7.8	9	124	9.37	67	2.2	19	1	0.6	75	52	3	130	4.4	264.4	683.1	2.5	1.9	110.8	77.5	28.81
119	2	80	2	1	2	0	11.3	6	153	4.34	22	0.7	52	1	1	37	30	3.7	137	4.5	22.4	145.1	2.9	0.5	62.7	61.9	80.95
120	2	80	2	2	2	0	12.2	3	125	7.97	17	0.6	82	2	0.6	493	364	4	135	4.2	25	56.5	2.9	0.2	66.2	26.1	114.1
121	2	58	1	2	2	0	11.3	3	69	1.57	14	0.9	69	1	1.5	46	51	4	133	3.9	26	60.1	2.2	0.2	44.2	19.5	124.75
122	2	67	2	2	2	0	12	16	234	20.6	18	1.1	57	1	0.7	42	50	2.9	135	3.9	53.8	345.1	4.4	0.5	84.7	31.3	30.13
123	2	72	2	2	2	0	12.5	6	265	7.4	9	0.6	79	2	0.2	21	15	3.8	147	4.3	16	236.5	4.3	0.1	122.7	65	56.31
124	2	76	2	2	2	1	13.7	14	89	0.9	26	1.3	33	2	1.1	197	117	3.1	134	3.5	123	209.4	3.9	0.2	57.1	29.6	32.87
125	1	77	2	2	2	0	13.2	13	153	8.45	21	1.1	61	2	1.1	135	108	3	130	4	33.9	190.4	3.1	0.2	205.3	56.9	97.81
126	2	65	2	2	2	0	12.2	5	167	10.98	20	0.9	58	2	0.7	1022	878	4.1	140	5	14.5	91.7	2.3	0.8	76.7	24.4	14.1
127	2	65	1	1	1	1	10.5	13	227	20.3	66	2.7	17	1	0.3	28	31	2.8	133	4	569.2	643.3	6.2	0.9	83.4	96.3	81.07
128	2	78	2	2	2	0	13.3	7	116	9.6	10	0.7	71	2	0.7	50	42	3.5	136	3.8	71.4	117.1	3.7	0.1	117.8	36.5	32.99
129	2	50	2	2	2	0	14.4	7	175	1.82	11	0.9	89	2	0.4	42	29	4.1	140	4.4	6.7	92.3	2.3	0.1	32.6	11.7	282.14
130	2	54	2	2	2	0	15	2	109	2.73	8	0.9	85	2	0.6	42	25	4.1	138	4	11.4	66.3	1.8	0.1	29.6	15.6	1186
131	1	73	2	2	2	0	14.1	8	204	1.16	15	0.9	73	1	0.4	62	61	4	136	4	6.6	184.8	1	0.2	4.1	15.7	2.43
132	2	65	2	2	2	0	12.2	5	167	10.98	30	1.3	40	2	0.7	1022	878	4.1	140	5	7.1	75.4	1.9	0.6	28.4	10.1	15.55
133	1	85	2	2	2	1	12.3	10	111	14.46	30	1.4	25	1	0.8	94	43	3.7	136	4.2	61.6	362.8	4.3	0.5	269.6	79.8	62.52
134	2	60	2	2	2	0	13	9	130	7.74	16	0.8	89	2	0.8	123	97	3.3	137	4	21.9	101.2	1.7	0.2	151.9	18	99.38
135	2	44	2	2	2	0	15.1	4	120	6.78	11	1.1	71	2	0.6	33	33	4.1	140	4	2.6	131.3	1.7	0.2	47.6	20.2	1364
136	1	72	2	2	2	0	13	3	123	5.59	20	1	99	2	0.6	141	120	3.7	140	4.5	30.9	114.6	0.6	0.2	35.4	29.5	587.85
137	1	56	2	1	2	0	14.8	10	155	14.96	15	1.1	77	1	0.9	41	39	4.1	138	4	8.6	171	2.3	0.1	88.3	81.8	47.02
138	2	67	2	1	2	0	13.9	20	196	4.5	13	0.9	72	1	0.5	25	30	4.7	139	4	29.8	142	1.9	0.4	1	1.7	5.63
